# Supplementary figures and images for: EWSR1::ATF1 Orchestrates the Clear Cell Sarcoma Transcriptome in Human Tumors and a Mouse Genetic Model
Source: MDPI journal article supplement (doi:10.3390/cancers15245750), 2023-12-08

V5

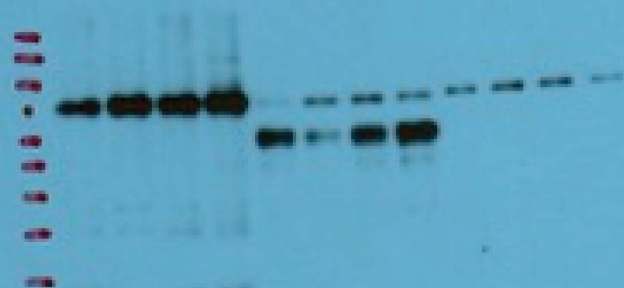

EWS

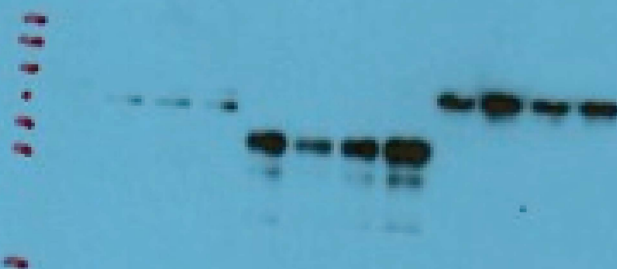

V5

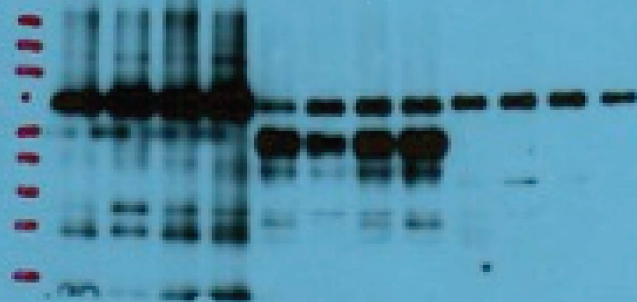

EWS

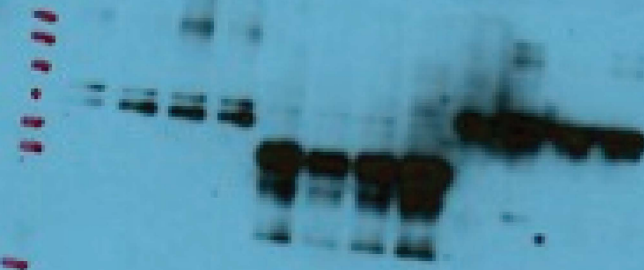

Supplement: s1 [file s1]
